# Supplementary material for: CRISPR-Hybrid: A CRISPR-Mediated Intracellular Directed Evolution Platform for RNA Aptamers
Source: PubMed Central journal article supplement — Nat Commun. 2025 Jan 11;16:595. doi: 10.1038/s41467-025-55957-0 (PMC11724954; doi:10.1038/s41467-025-55957-0), 2025-01-11

## Supplementary Information

### **CRISPR-Hybrid: A CRISPR-Mediated Intracellular Directed Evolution Platform for RNA Aptamers**

Qiwen Su-Tobon<sup>1</sup>, Jiayi Fan<sup>1</sup>, Michael Goldstein<sup>1</sup>, Kevin Feeney<sup>1</sup>, Hongyuan Ren<sup>1</sup>, Patrick Autissier<sup>2</sup>, Peiyi Wang<sup>1</sup>, Yingzi Huang<sup>1</sup>, Udayan Mohanty<sup>1</sup> and Jia Niu<sup>1\*</sup>

<sup>1</sup>Department of Chemistry, Boston College, Chestnut Hill, MA, USA.

<sup>2</sup>Department of Biology, Boston College, Chestnut Hill, MA, USA.

## **Table of Contents**

### **Supplementary Tables**

Supplementary Table 1. gRNA sequences used in E. coli cells.

Supplementary Table 2. gRNA sequences used in HEK293T cells.

Supplementary Table 3. qPCR primers used in this work.

Supplementary Table 4. Amplification primers used to generate the aptamer libraries.

Supplementary Table 5. Oligonucleotides used for NGS.

Supplementary Table 6. Aptamers used in this work.

### **Supplementary Figures**

Supplemental Figure 1: CRISPR-hybrid optimizations.

Supplemental Figure 2: Antibiotic mock selection with RpoZ activator.

Supplemental Figure 3: Optimizations with SoxS<sub>R93A</sub> transcriptional activator.

Supplemental Figure 4: Antibiotic mock selection with SoxS<sub>R93A</sub> activator.

Supplemental Figure 5: FACS optimizations.

Supplemental Figure 6: FACS gating strategy.

Supplemental Figure 7: Mock Selection.

Supplemental Figure 8: Design of aptamer library.

Supplemental Figure 9: Binding activity and selectivity of QCP aptamers.

Supplemental Figure 10: Analysis of HTS data from QCP initial intracellular aptamer selection.

Supplemental Figure 11: A1 mutants binding activity and specificity.

Supplemental Figure 12: Analysis of HTS data from QCP second intracellular selection.

Supplemental Figure 13: Bacteria CRISPR activation of dual-fluorescent reporter with dual aptamers.

Supplemental Figure 14: SPR kinetic measurements.

Supplemental Figure 15: Scrambled A9 binding activity in HEK293T cells.

Supplemental Figure 16: QCP-A9 complex structure and binding activity of QCP mutants

**Supplementary Table 1. gRNA sequences used in E. coli cells.**

| <b>Name</b> | <b>Sequence (5' to 3')</b> |
|-------------|----------------------------|
| G0          | GUGAACCGCAUCGAGCUGAA       |
| G1          | AACACGCACGGUGUUAUUAU       |
| G2          | UAGGGACCCUACAACACGCA       |
| G3          | CGUUUUGCUGAGGAGACUUA       |
| G4          | CUGGGCCUUUCGUUUUGCUG       |
| G5          | AAAGGCUCAGUCGAAAGACU       |
| G6          | GUAACACCGUGCGUGUUGUA       |
| G7'         | AGUCUCCUCAGCAAAACGAA       |
| G8'         | AGCCUUUCGUUUUAUUUGAC       |
| G9'         | AUGUCCUCUUGACAGUAAGA       |
| G10'        | AUCCGGUCAAAUAAAACGAA       |
| G11'        | CUUACUGUCAAGAGGACAUC       |
| G12'        | UUACCCGUCUACUGUCAAG        |
| 1.1         | AACACGCACGGUGUUAUUAU       |
| 1.2         | CGGAUCUCCACAACACGCA        |
| 1.3         | UUAUCACCUUGGCUGCAGGC       |
| 1.4         | AUGUAACACCGUGCGUGUUG       |
| 1.5         | CGUGCGUGUUGUGGAAGAUC       |
| 1.6         | GAAGAUCGGCCUGCAGCCA        |

**Supplementary Table 2. gRNA sequences used in HEK293T cells.**

| <b>Name</b>    | <b>Sequence (5' to 3')</b> |
|----------------|----------------------------|
| Gluc           | GUGAAUGAUGAUAAUACGAUG      |
| <i>ASCL1-1</i> | GCUGGGUGUCCCAUUGAAA        |
| <i>ASCL1-2</i> | GCAGCCGCUCGCUGCAGCAG       |
| <i>ASCL1-3</i> | GUGGAGAGUUUGCAAGGAGC       |
| <i>ASCL1-4</i> | GUUUAUUCAGCCGGGAGUC        |
| <i>XIST1-1</i> | GGCAGCGCUUUAAGAACUGAA      |
| <i>XIST1-2</i> | GGACUGAAGAUCUCUCUGCACUU    |
| <i>XIST1-3</i> | GGCCAUAUUUCUUACUCUCUCG     |

**Supplementary Table 3. qPCR primers used in this work.**

| <b>Target</b> | <b>Forward primer</b>    | <b>Reverse primer</b>    |
|---------------|--------------------------|--------------------------|
| <i>ASCL1</i>  | GGAGCTTCTCGACTTCACCA     | AACGCCACTGACAAGAAAGC     |
| <i>XIST1</i>  | AGGTCAGGCAGAGGAAGTCA     | CTGCCTCCCGATACAACAAT     |
| <i>GAPDH</i>  | TTCGACAGTCAGCCGCATCTTCTT | GCCCAATACGACCAAATCCGTTGA |

**Supplementary Table 4. Amplification primers used to generate the aptamer libraries.**

| <b>Oligo</b> | <b>Sequence (5' to 3')</b>                                                                        | <b>Description</b>                           |
|--------------|---------------------------------------------------------------------------------------------------|----------------------------------------------|
| QSL2         | GTAAAAATAAGGCTAGTCCGTTATCAACTTGAAAAA<br>GTGCGCACATNNNNNNNNNNATGTGCTTTTTTTG<br>AAGCTTGGGCCCGAACAAA | Forward primer for piece A<br>of N11 library |
| QSL5         | TAAAATAAGGCTAGTCCGTTATCAACTTGAAAAAGT<br>GCGCNNNNTAGCTAAGCTANNNNGCTTTTTTTGAA<br>GCTTGGGCCCGAACAAA  | Forward primer for piece A<br>of N8 library  |
| QS94         | ACTCGAGTAAGGATCCAGTTCACCGAC                                                                       | Reverse primer for piece A                   |
| QS91         | GAAAAGTGCCACCTGACGTCTAAGAAACCATTATT                                                               | Forward primer for piece B                   |
| QS92         | TTTTCAAGTTGATAACGGACTAGCCTTATT                                                                    | Reverse primer for piece B                   |
| QS95         | GTCGGTGA ACTGGATCCTTACTCGAGT                                                                      | Forward primer for piece C                   |
| QS96         | AATAATGGTTTCTTAGACGTCAGGTGGCACTTTTC                                                               | Reverse primer for piece C                   |

**Supplementary Table 5. Oligonucleotides used for NGS.**

| <b>Oligo</b> | <b>Sequence (5' to 3')</b>                          |
|--------------|-----------------------------------------------------|
| QS_seq18     | ACACTCTTTCCCTACACGACGCTCTTCCGATCTTTGACAGCTAGCTCAGTC |
| QS_seq19     | GACTGGAGTTCAGACGTGTGCTCTTCCGATCTGTTTTGTTCCGGCCCAAG  |

Sequencing adapters are highlighted in yellow

**Supplementary Table 6. Aptamers used in this work.**

| <b>Aptamer</b>    | <b>Sequence (5' to 3')</b> |
|-------------------|----------------------------|
| MS2               | ACAUGAGGAUCACCCAUGU        |
| The Q $\beta$ RNA | AUGCAUGUCUAAGACAGCAU       |
| A1                | ACAUUAGCUAAGCUAAUGU        |
| A2                | ACAUGUACUAAGUACAUGU        |
| A3                | ACAUAGGCUAAGCCUAUGU        |
| A4                | GGAUAGCUAAGCUACC           |
| A5                | UGCUAGCUAAGCUAACA          |
| A6                | UGUUAGCUAAGCUAUCA          |
| A7                | AGUUAGCUAAGCUAAUU          |
| A8                | UUUAGCUAAGCUAGGG           |
| A9                | CCUUAGCUAAGCUAAUGG         |
| A10               | UGAUAGCUAAGCUACCA          |
| A11               | UUCUAGCUAAGCUAGGA          |
| A12               | GAGUAGCUAAGCUACCC          |
| A13               | UUAUAGCUAAGCUAUAG          |
| A14               | CCAUUAGCUAAGCUAAUGG        |
| A15               | CCGUUAGCUAAGCUAAUGG        |
| A16               | CCUUUAGCUAAGCUAAUGG        |
| A17               | CCUCUAGCUAAGCUAUAGG        |
| A18               | CCCUUAGCUAAGCUAAGUG        |
| A19               | CCCUUAGCUAAGCUAAGGU        |
| A20               | CCUUAGCUAAGCUAAUC          |
| A21               | UUUCAUAACCGUCCAGAGG        |



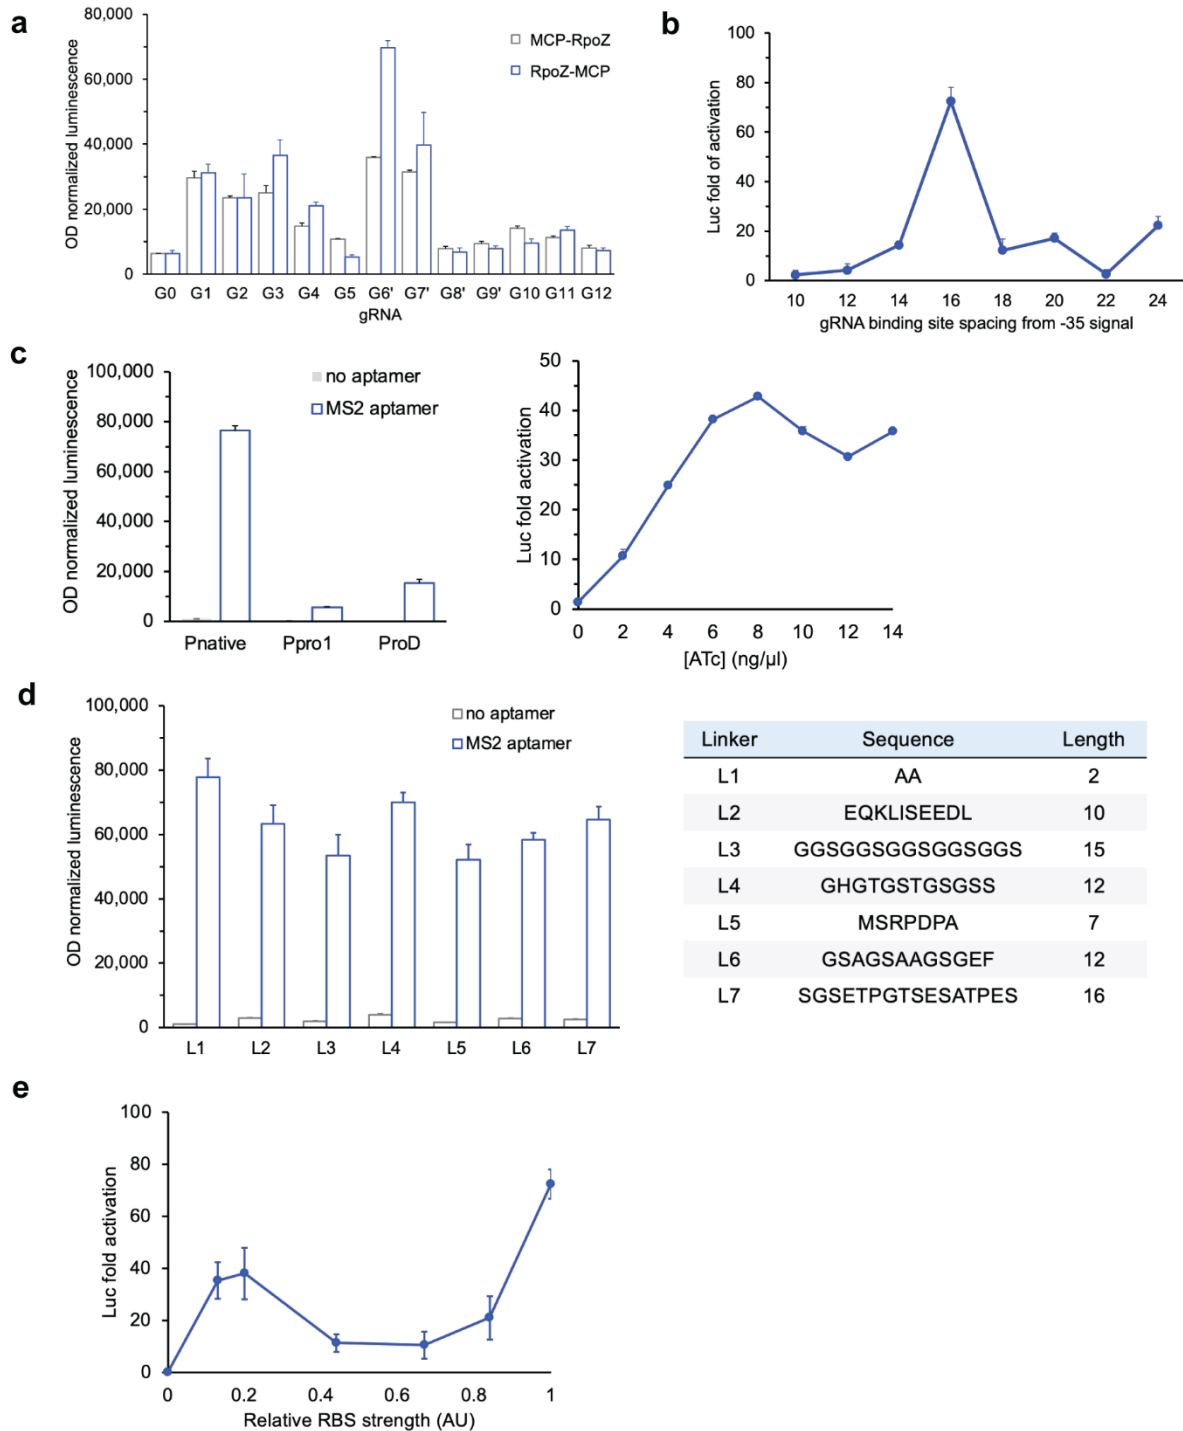

### Supplemental Figure 1: CRISPR-hybrid optimizations.

Luciferase expression in *E. coli* was used as reporter gene. **a**, gRNAs targeting the luciferase reporter, as well as a scrambled guide RNA negative control (G0) were tested with MCP-RpoZ and RpoZ-MCP. The highest levels of transcriptional activation were achieved with G6' guide

RNA and RpoZ-MCP. **b**, Guide RNA-promoter binding site spacing strongly affects transcriptional activation levels; G6' binding at 16 base pairs upstream of the -35box in the J23107 promoter resulted in the most robust activation. **c**, Expression of dCas9 was driven by different constitutive promoters (left) and anhydrotetracycline inducible promoter (right). dCas9 expressed from the *S.pyogenes* promoter (Pnative) led to the strongest luciferase transcriptional activation by MS2 aptamer recruitment of RpoZ-MCP. **d**, Tests of seven different linkers between MCP and RpoZ. Linker 1 resulted with the highest reporter activation. **e**, Ribosome-binding site (RBS) modification enables robust modulation of the reporter activation levels. Data represent mean of three independent experiments  $\pm$  s.d.

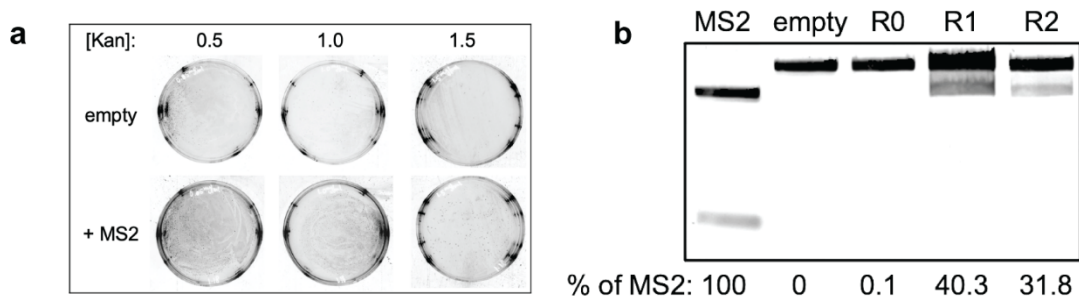

**Supplemental Figure 2: Antibiotic mock selection with RpoZ activator.**

**a**, MS2 can recruit RpoZ-MCP to activate the expression of antibiotic resistance gene. **e** compared with *ScaI* and *AleI* digestion. Survival of cells harboring MS2 aptamer or no aptamer was measured on solid medium supplemented with increasing concentration of kanamycin. **b**, Gene compositions before and after mock selection were compared with *ScaI* and *AleI* digestion.

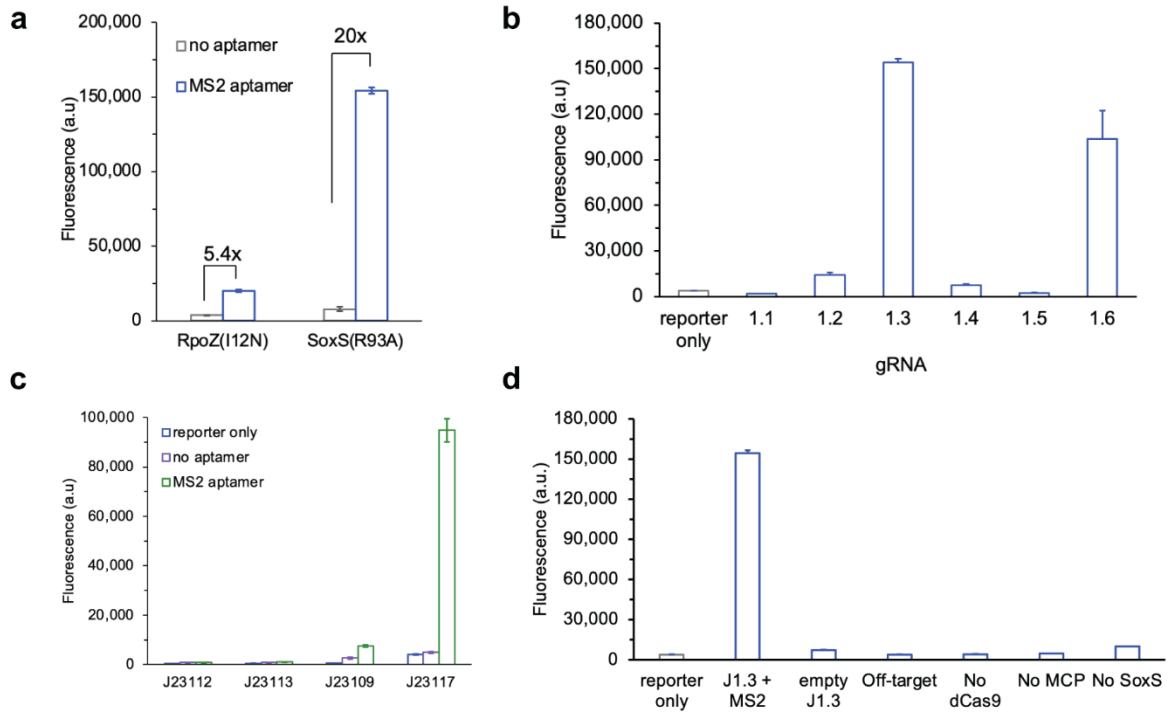

**Supplemental Figure 3: Optimizations with SoxS<sub>R93A</sub> transcriptional activator.**

sfGFP was used as reporter gene. **a**, Transcriptional activator SoxS<sub>R93A</sub> showed 20-fold increase in reporter gene expression. **b**, Guide RNA 1.3 binding at 80 base pairs upstream of transcriptional start site yielded a 56-fold increase in GFP expression, compared to expression from reporter plasmid only. **c**, RNAP-minimal promoter affinity was evaluated with a series of bacterial J23 promoters, and J23117 resulted in the largest reporter fold activation by CRISPRa. **d**, Reporter activation was observed only when all components of CRISPRa are included. Data represent mean of three independent experiments  $\pm$  s.d.

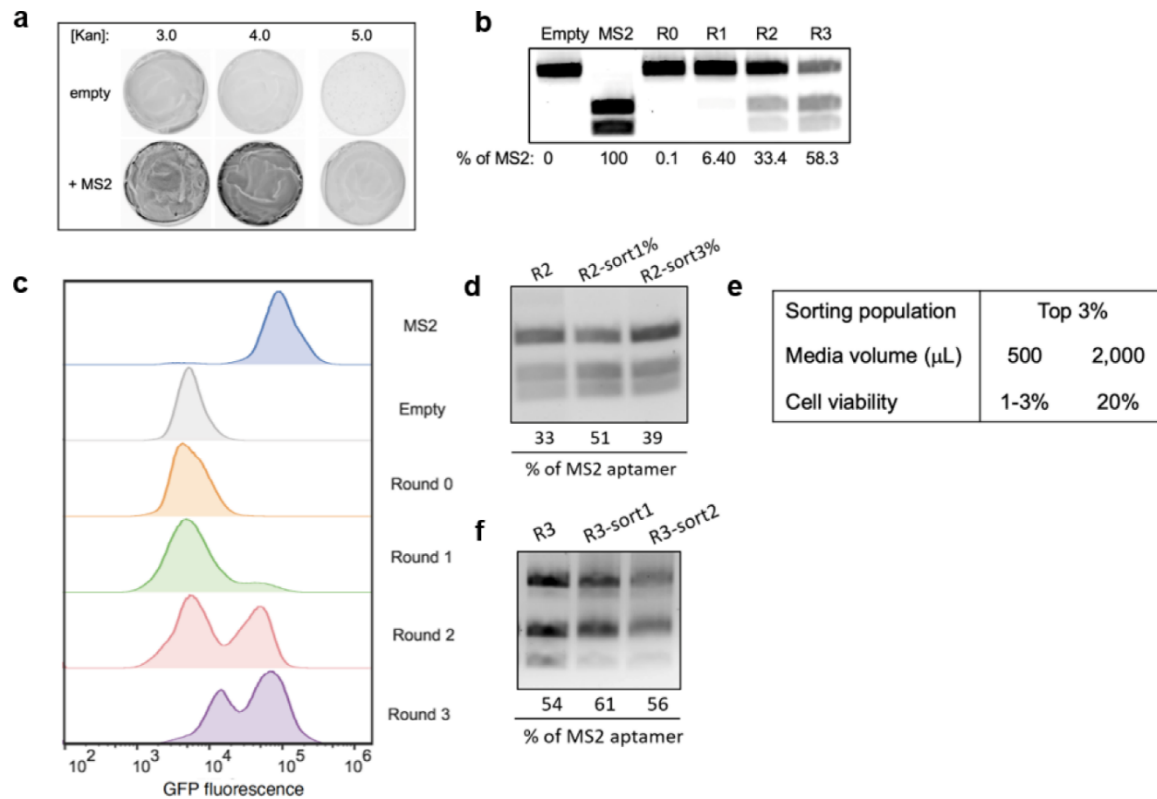

**Supplemental Figure 4: Antibiotic mock selection with SoxS<sub>R93A</sub> activator.**

**a**, Dynamic range of [Kan-GFP] reporter. Survival of cells harboring MS2 aptamer or randomized aptamer was measured on solid medium supplemented with increasing concentration of kanamycin. Cells with MS2 recruiting MCP-SoxS<sub>R93A</sub> showed robust expression of Kan-GFP resistance gene for cell survival of up to 5.0mg/ml. **b**, Aptamer compositions before and after mock selection were compared with *ScaI* and *AleI* digestion. **c**, Fluorescence histogram overlays showed cell populations after antibiotic selection are distinguishable on flow cytometry. **d**, Sorting most fluorescent 1% cells from round 2 of antibiotic selection yielded higher recovery of MS2 aptamer than sorting the top 3% cells. **e**, Increasing collection media volume improved cell viability post FACS. **f**, Following optimized conditions to sort the most fluorescent 1% cells from round 3 of antibiotic selection resulted in slight higher enrichment of MS2 aptamer.

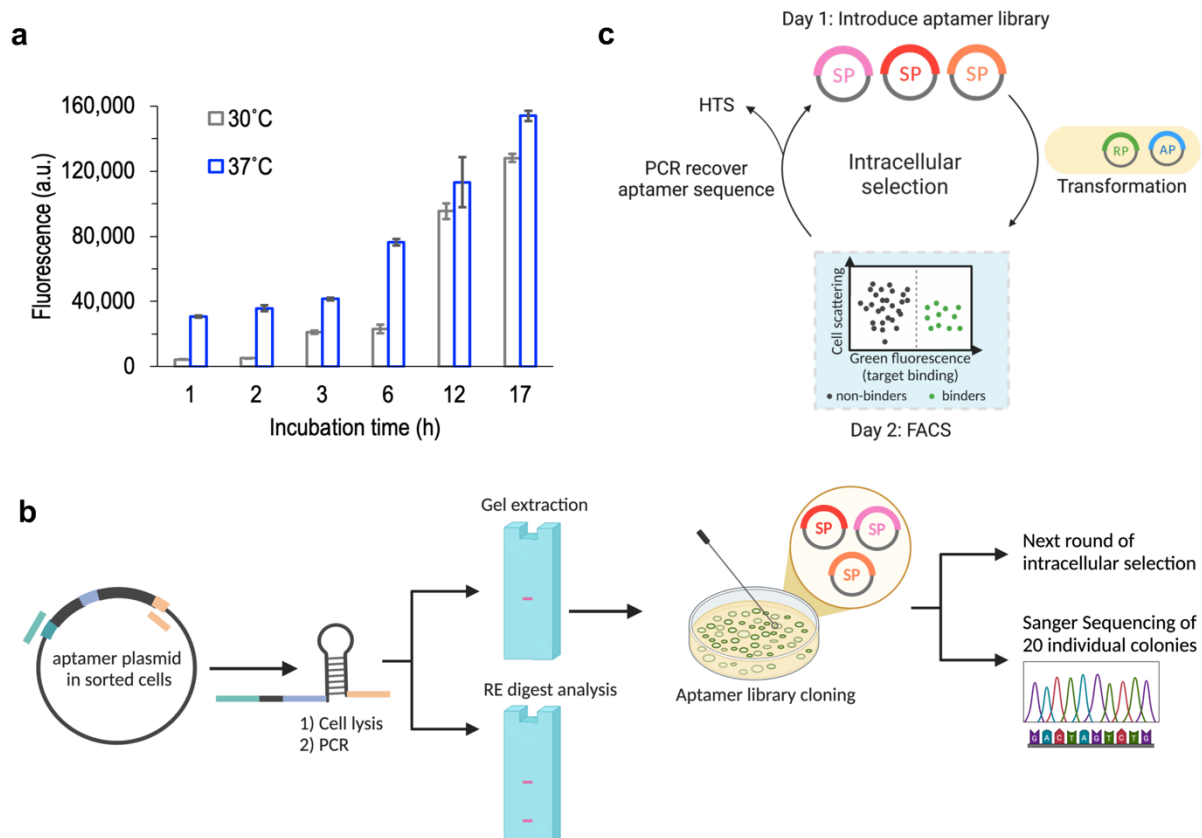

### Supplemental Figure 5: FACS optimizations.

**a**, Transcriptional activation of *sfGFP* reporter by CRISPR-hybrid with MS2 was measured at different *E. coli* growth temperature and time. Maximal *sfGFP* activation was observed from cells grown at 37°C for 17 h. Data represent mean of three independent experiments  $\pm$  s.d. **b**, Schematic of the Rescue-PCR strategy for maximal recovery of sorted aptamer sequences. **c**, Overview of CRISPR-hybrid selection process coupled with FACS.

### 1) Select for single cells

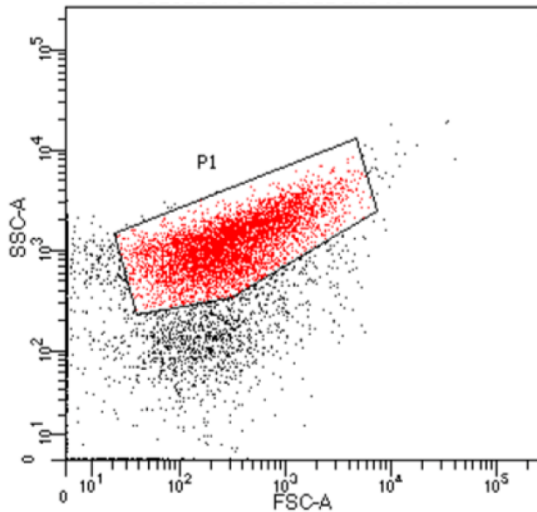

### 2) Analyze as single population

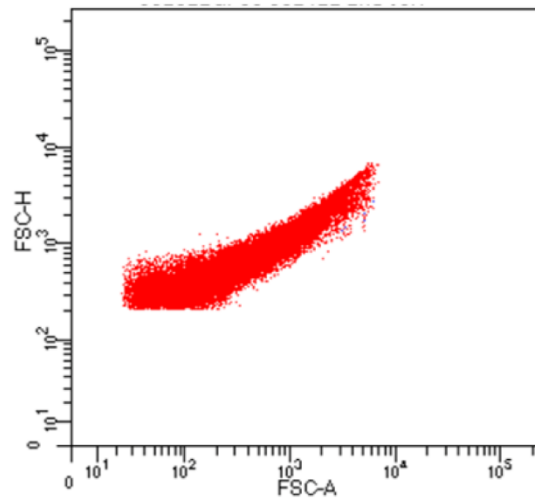

### 3) Set sorting gate excluding negative control

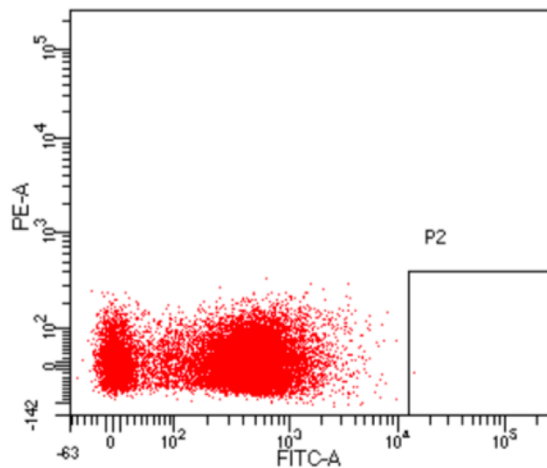

### 4) Adjust sorting gate to include the brightest 0.007% cells

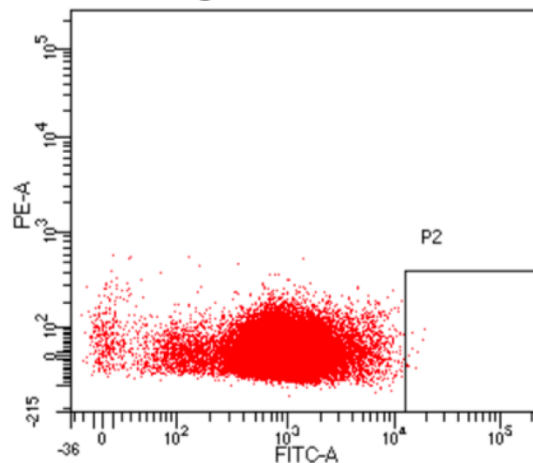

## Supplemental Figure 6: FACS gating strategy.

Single bacterial cells were selected **(1)** by applying a gate (P1) on the FSC-A vs. SSC-A plot. These cells were analyzed **(2)** as single population on the FSC-A vs. FSC-H plot. The GFP fluorescence of the single cells were analyzed in the FITC channel and plotted as FITC-A vs. PE-A. Color compensation was applied to correct potential GFP fluorescence spilled over to the PE channel. A sorting gate (P2) was applied **(3)** by excluding cells carrying empty sgRNA (no aptamer), which served as negative control. Then, the sorting gate was adjusted **(4)** to the right and only the brightest 0.007% of cells were collected.

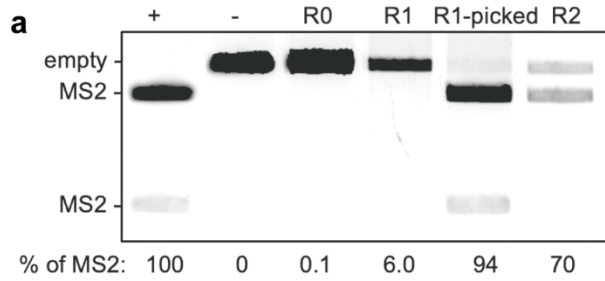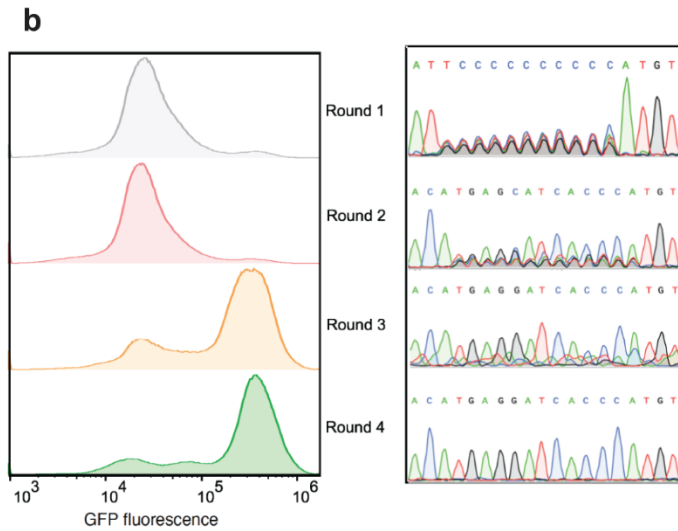

**Supplemental Figure 7: Mock Selection.**

**a**, Gene compositions before and after mock selection were compared with *ScaI* and *AleI* digestion, showing  $\geq 700$ -fold enrichment of MS2. R1-picked: R2 done by hand-picking colonies from R1. **b**, FACS histogram overlays of four rounds selection of the aptamer library in cells expressing MCP-SoxS.

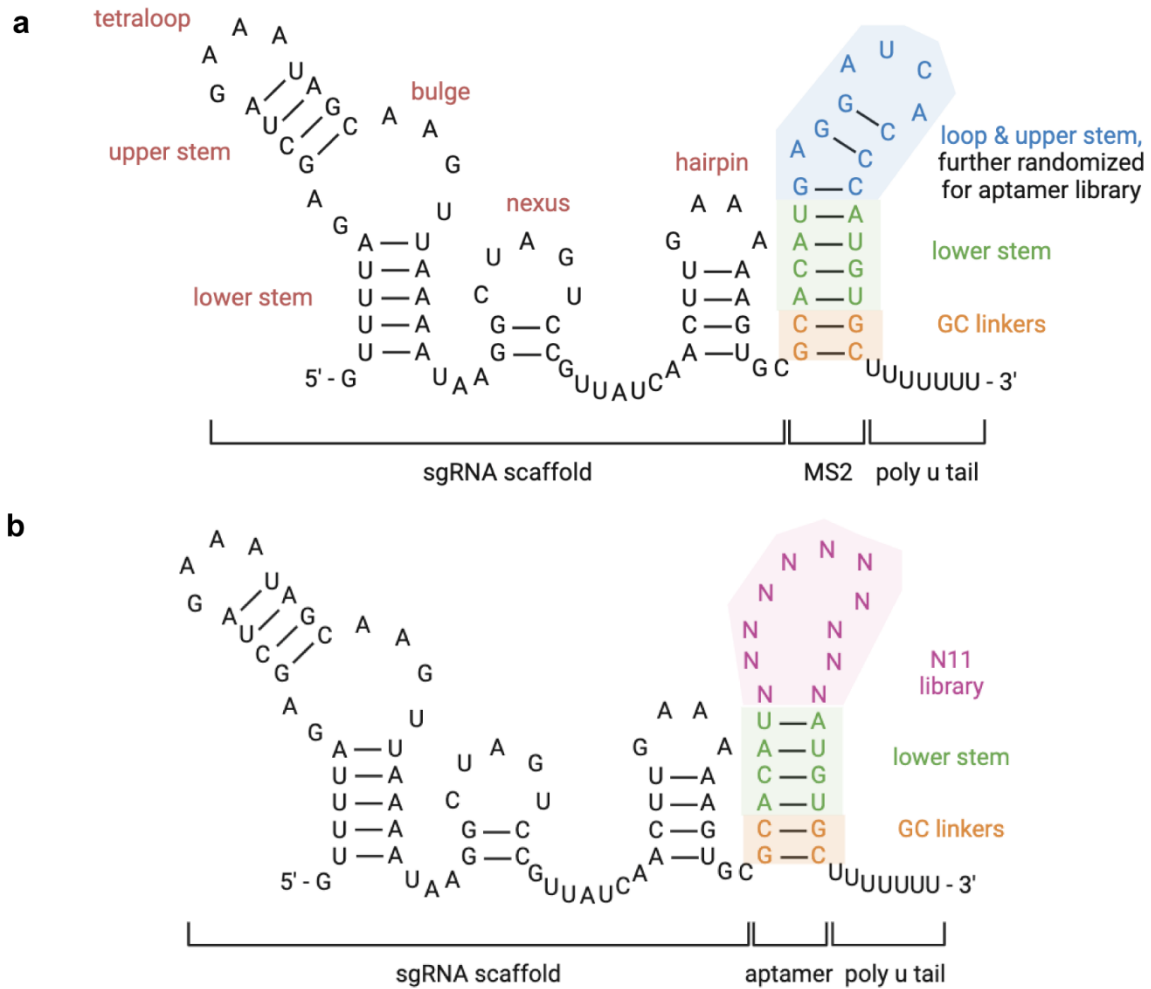

**Supplemental Figure 8: Design of aptamer library.**

- a**, Schematic of sgRNA scaffold extended with MS2 aptamer on the 3'-end with two GC linkers.
- b**, The loop and upper stem region of MS2 aptamer, 11 nucleotides total, is randomized for the N11 library.



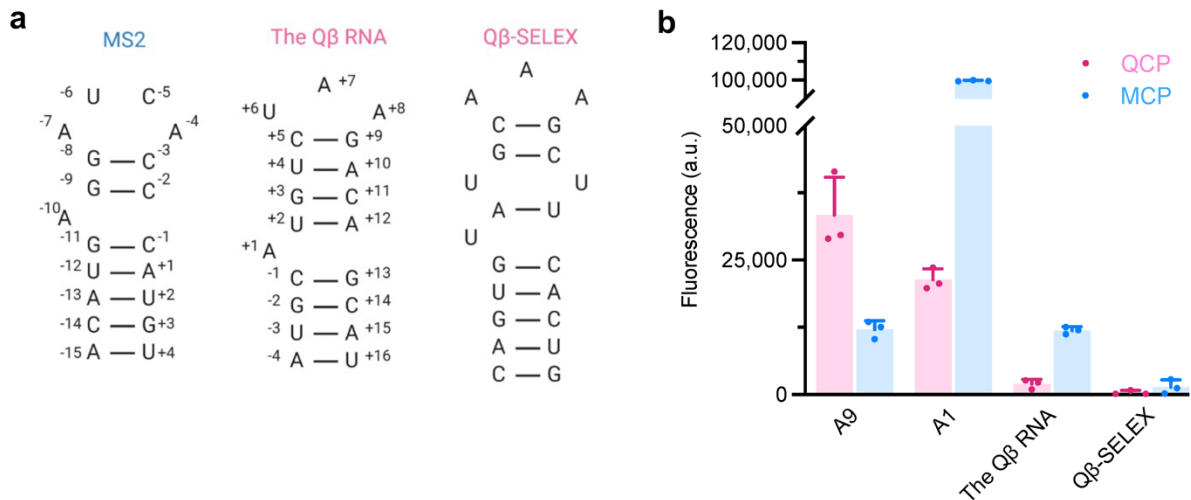

**Supplemental Figure 9: Binding activity and selectivity of QCP aptamers.**

**a**, Sequences of consensus aptamers MS2, the Q $\beta$  RNA, and SELEX-selected aptamer (Q $\beta$ -SELEX). **b**, A9 and A1 showed strong binding activity to QCP, while A9 exhibited reduced affinity for MCP. The Q $\beta$  RNA and Q $\beta$ -SELEX showed minimum to no binding activity to QCP *in vivo*, but exhibited enhanced nonspecific binding activity to MCP. Binding activity was measured by recruitment of RBP fused to SoxS<sub>R93A</sub> to activate downstream GFP reporter. Data represent mean of three independent experiments  $\pm$  s.d.

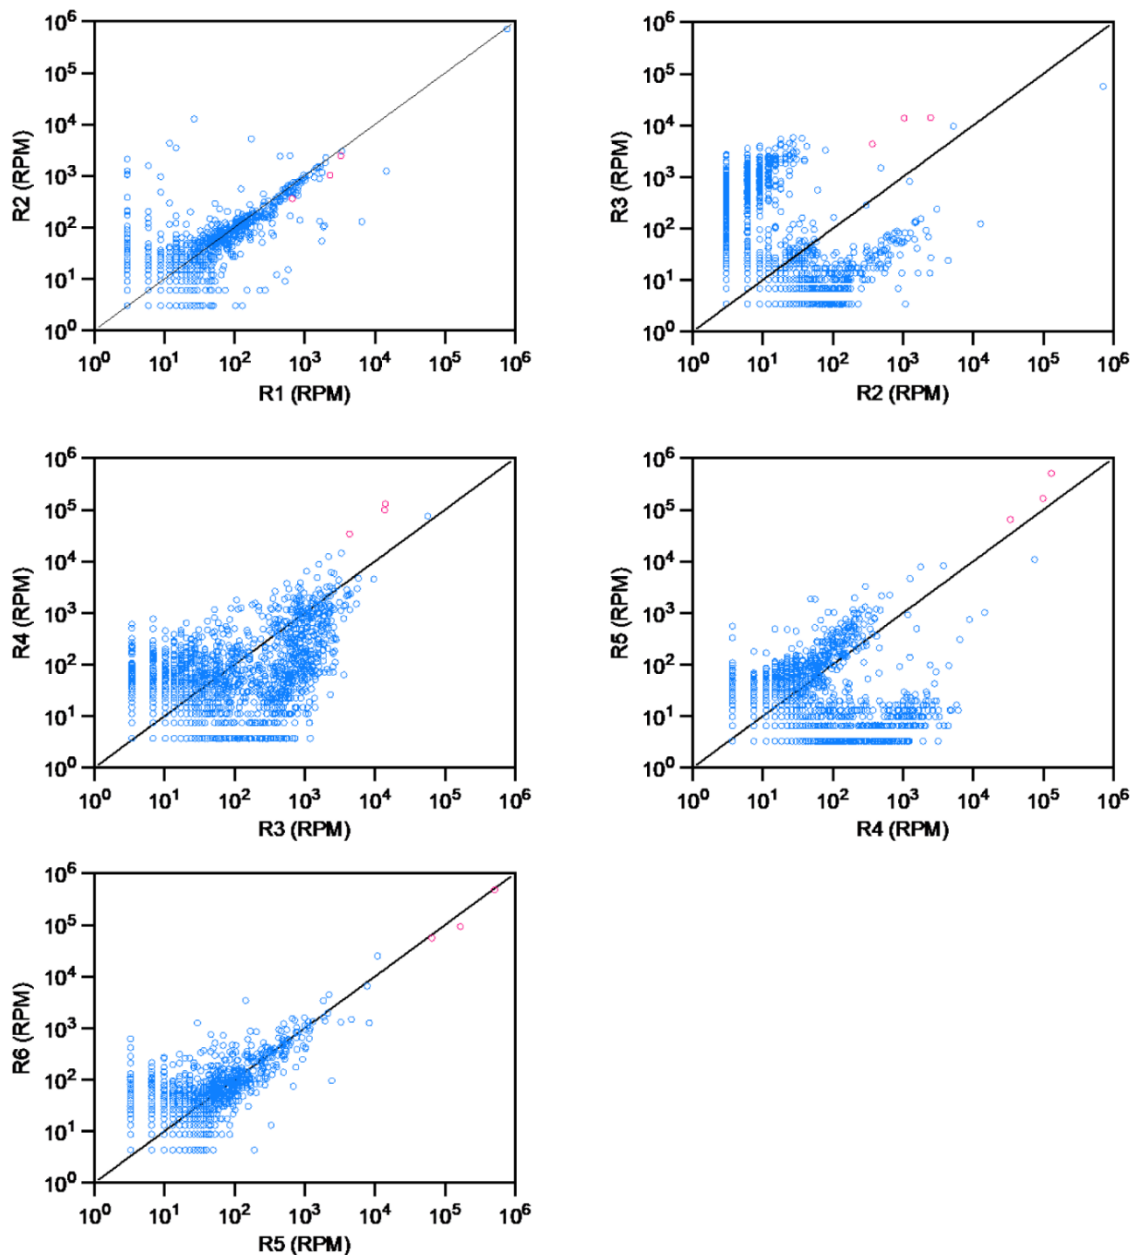

**Supplemental Figure 10: Analysis of HTS data from QCP initial intracellular aptamer selection.**

The abundances (reads per million, RPM) of sequences from two sequential rounds of library selection are shown as scatter plots. Enrichment patterns observed are consistent with overlay histograms in Fig. 2c, and R5-R6 shows a high degree of correlation. The top three aptamers in R6 are colored in pink.

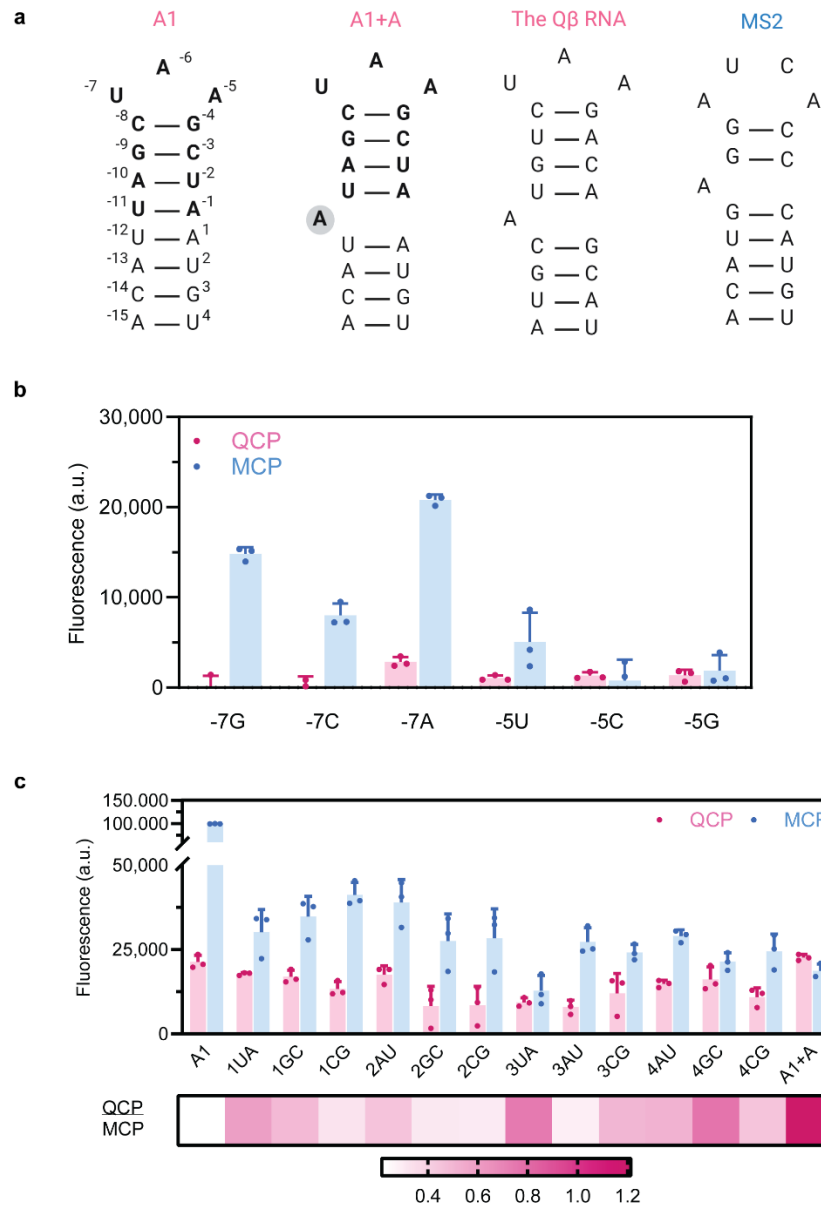

**Supplemental Figure 11: A1 mutants binding activity and specificity.**

**a**, Structure of A1 with its bases numbered, A1 variant A1+1, and two consensus aptamer the Q $\beta$  RNA and MS2. **b**, Fluorescence measurements of A1 variants with single base mutations in the loop region. Interactions to QCP was completely abolished and nonspecific binding to MCP was greatly reduced. **c**, Fluorescence measurements of A1 variants with single base pair mutations in the lower stem region (top panel). Binding preferences are plotted as ratios of QCP over MCP (bottom panel). Addition of a bulge nucleotide, A1+A variant, showed highest binding activity and specificity to QCP. Data represent mean of three independent experiments  $\pm$  s.d.

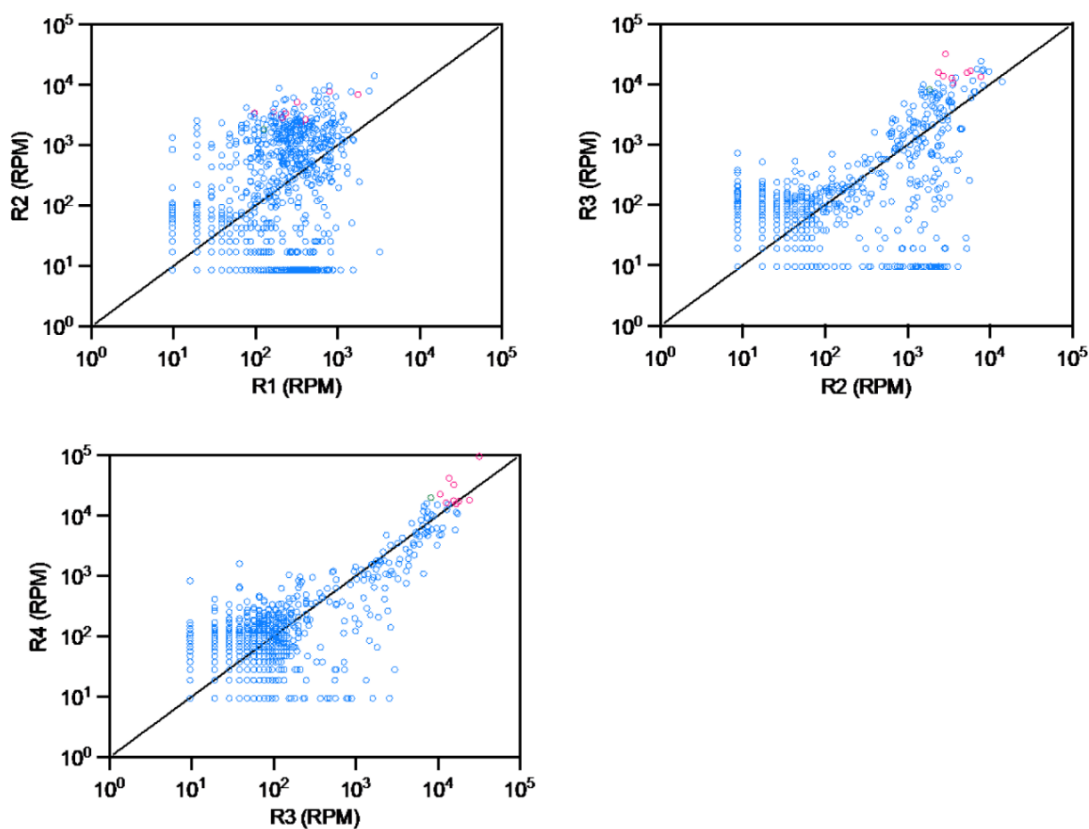

**Supplemental Figure 12: Analysis of HTS data from QCP second intracellular selection.**

The abundances (reads per million, RPM) of sequences from two sequential rounds of the second intracellular selection for QCP are shown as scatter plots. Enrichment patterns observed are consistent with overlay histograms in Fig. 3a, and R3-R4 shows a high degree of correlation. The top ten aptamers in R4 are colored in pink with the most active aptamer, A9, colored in green.

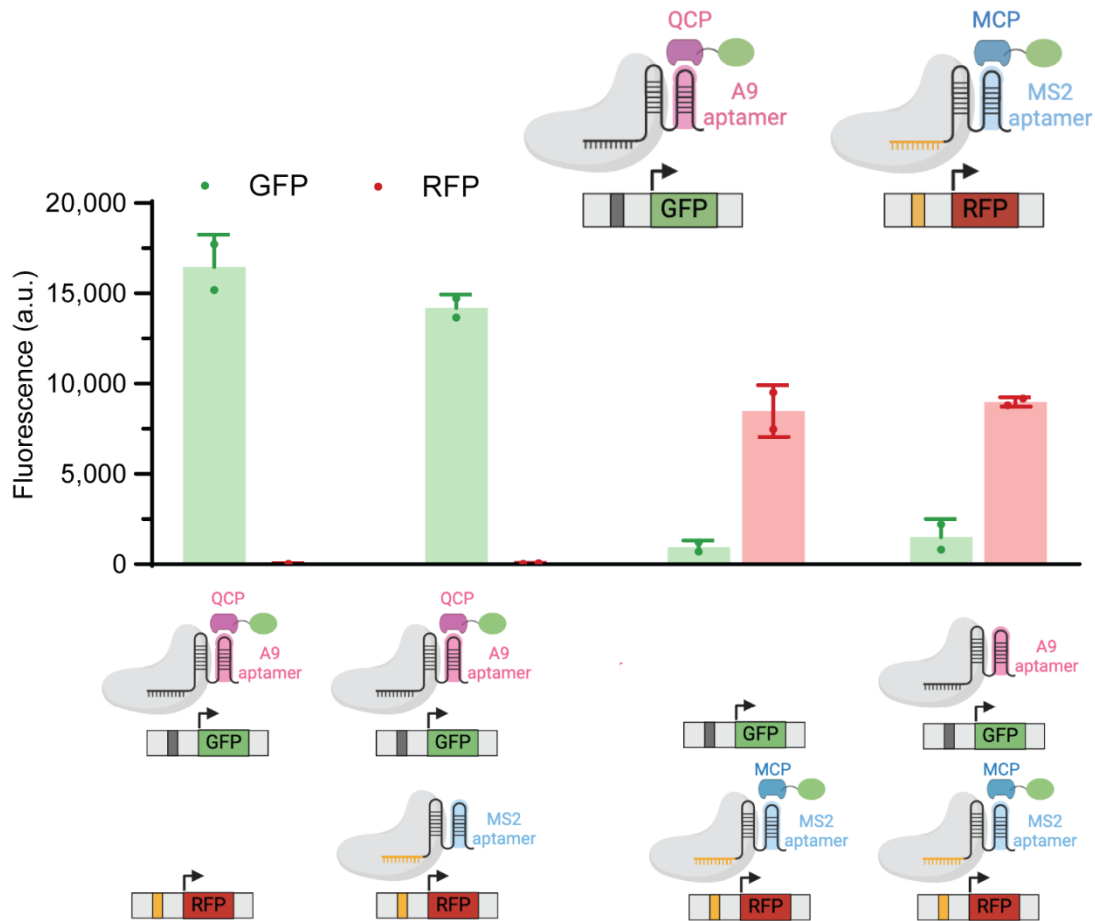

**Supplemental Figure 13: Bacteria CRISPR activation of dual-fluorescent reporter with dual aptamers.**

Two CRISPR constructs with programmed sgRNA-aptamer chimeras recruit specific RBP-transcriptional activator fusion proteins to target green or red fluorescent reporter (top panel). Fluorescence measurements of the designed dual CRISPR activation constructs with varied components (bottom panel). Values are mean  $\pm$  s.d. ( $n = 2$  independent replicates).

**a**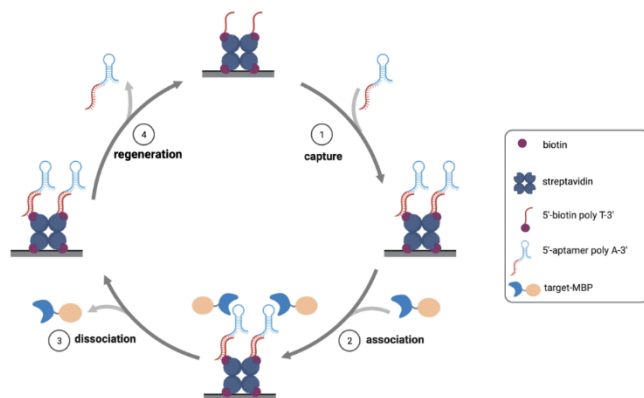**b**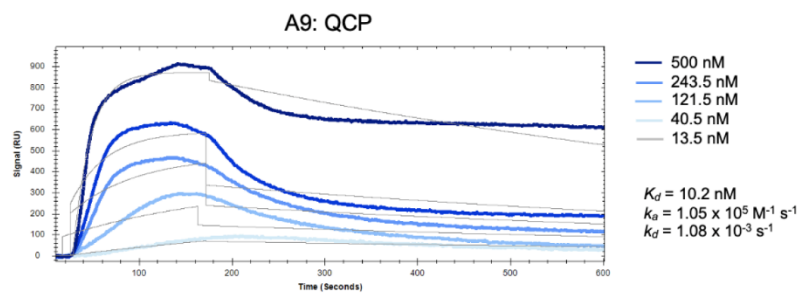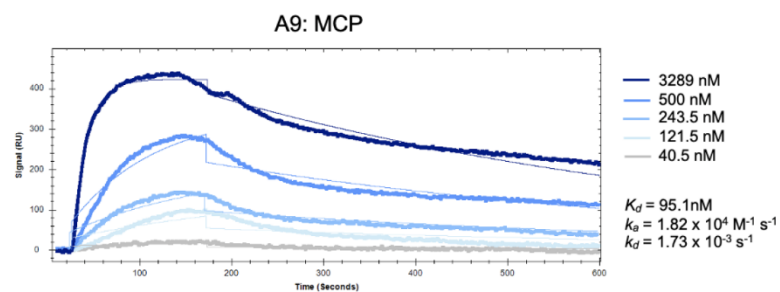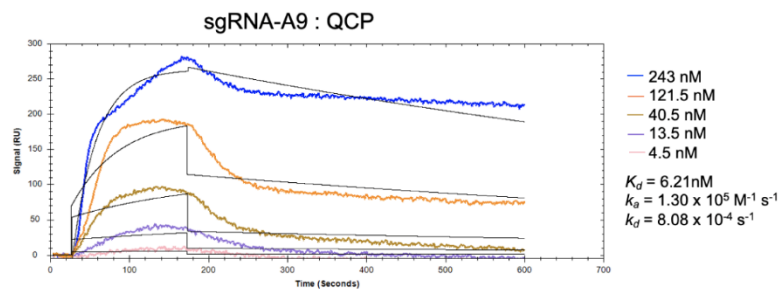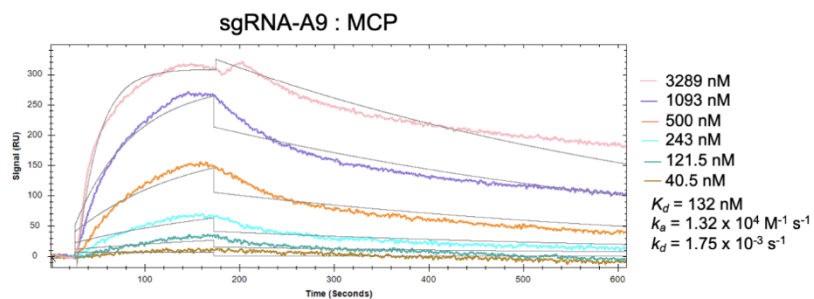

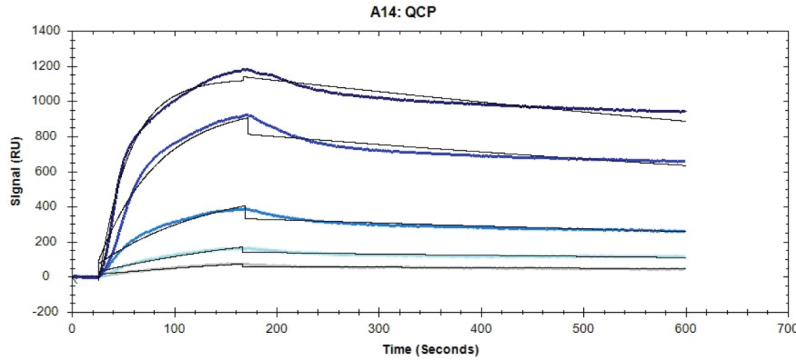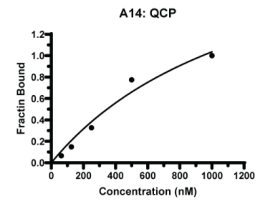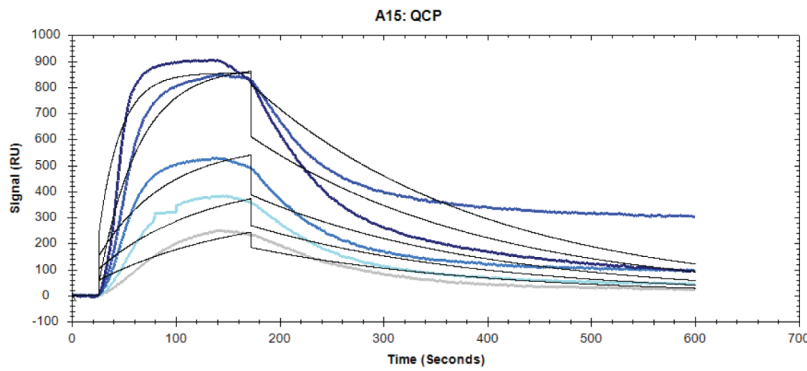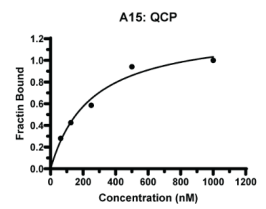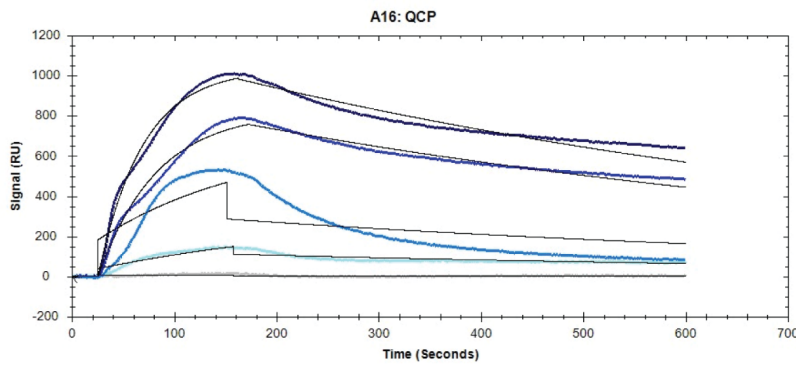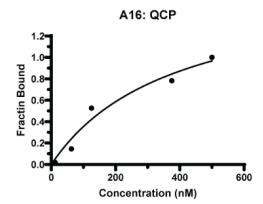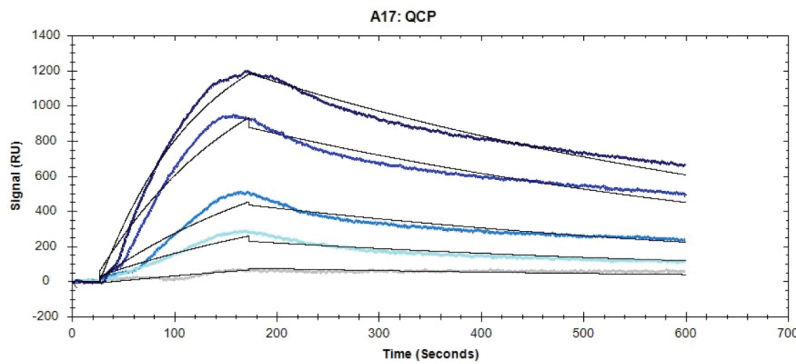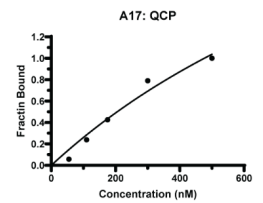

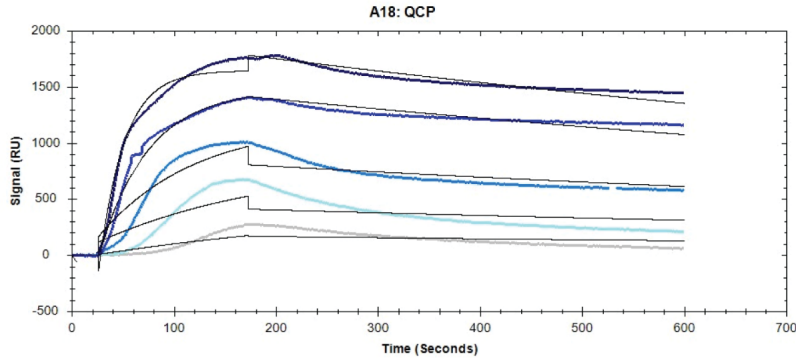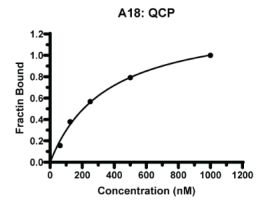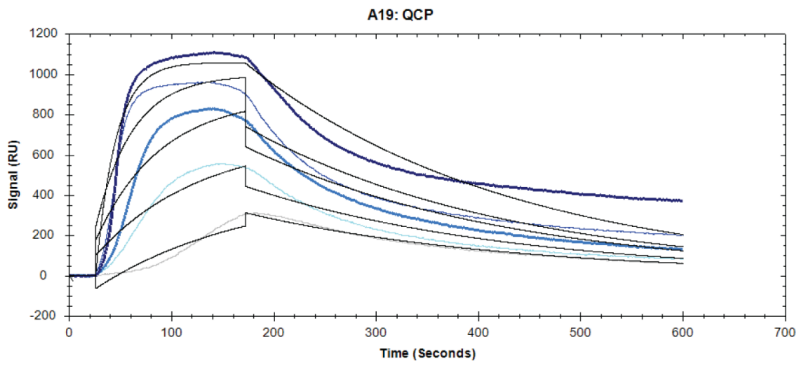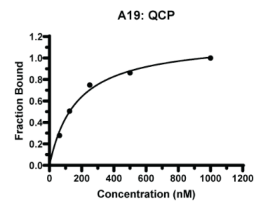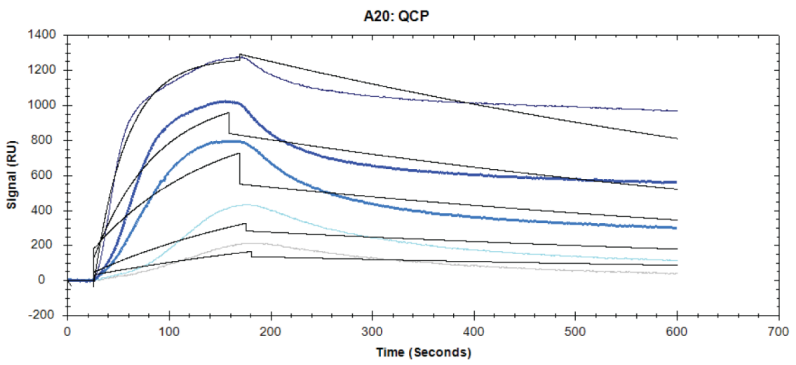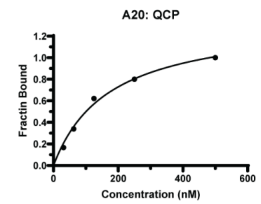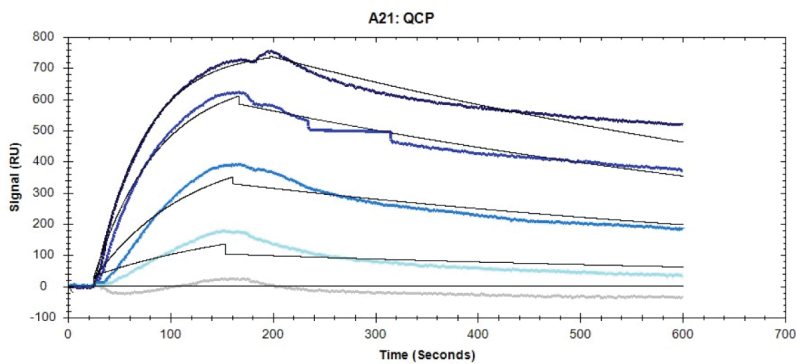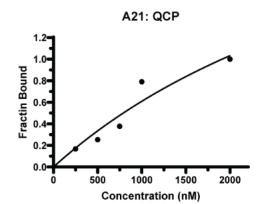



### Supplemental Figure 14: SPR kinetic measurements.

**a**, Illustration of SPR design. Biotinylated poly-T ssDNA is immobilized to streptavidin binding on biotin sensor. RNA aptamer extended with poly-A tail is captured onto the sensor by hybridizing with poly-T. Binding affinity of RNA aptamer with specific target protein is measured by recording the association and dissociation kinetics. Sensor is regenerated by removal of poly-A RNA aptamer for next cycle. **b**, Binding curves of A9, sgRNA-A9 and A9 variants with QCP and MCP, respectively.

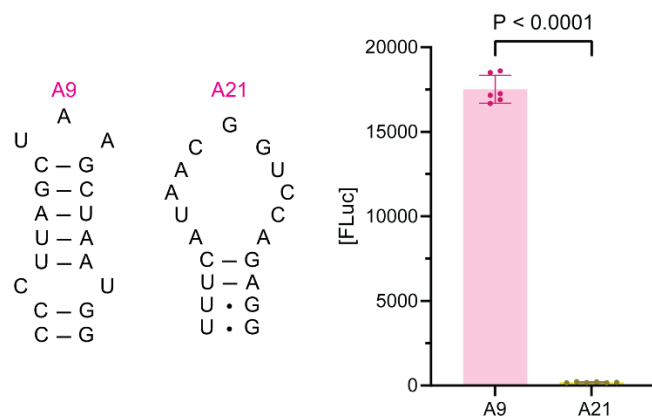

### Supplemental Figure 15: Scrambled A9 binding activity in HEK293T cells.

A9 shows high specificity for its cognate target QCP compared to an A9-scrambled sequence. Binding activities were measured using luciferase reporter, ( $n = 6$  technical replicates). Values are mean  $\pm$  s.d.,  $P$  values were determined by two-tailed unpaired Student's  $t$ -test.

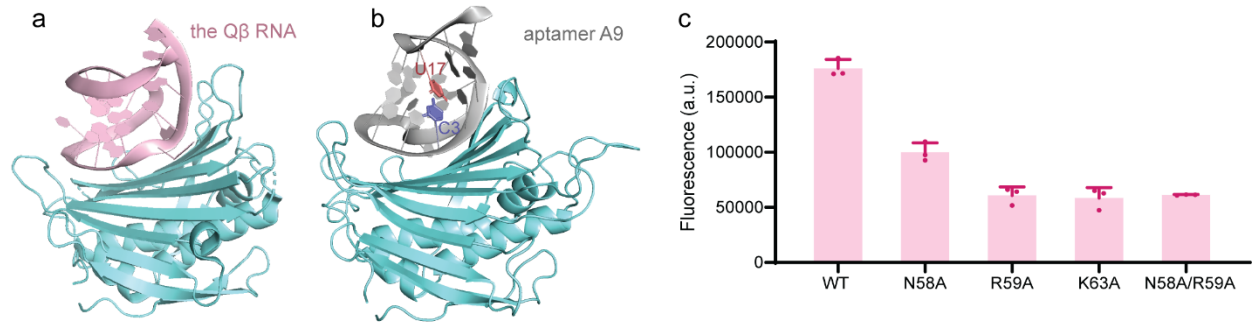

**Supplemental Figure 16: QCP-A9 complex structure and binding activity of QCP mutants.** **a**, Structure of the Q $\beta$  RNA (left, from PDB ID 4L8H) binding to the QCP. **b**, Structure of A9 aptamer binding to the QCP. C3 and U17 are represented in blue and red. The overall binding pose of A9 is similar to that of the Q $\beta$  RNA. **c**, Fluorescence measurement of *E. coli* cells expressing A9 and mutants of QCP. Mutations to N58, R59, and K63 of QCP all led to significantly reduced fluorescence, indicating that these residues are essential for the A9-QCP interaction. Data represent mean of three independent experiments  $\pm$  s.d.

Uncropped gel for Suppl. Fig. 2b

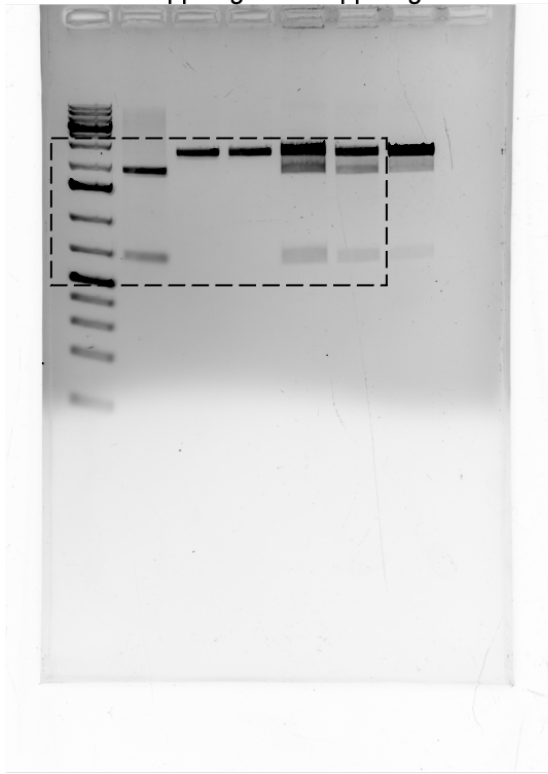

Uncropped gel for Suppl. Fig. 4b

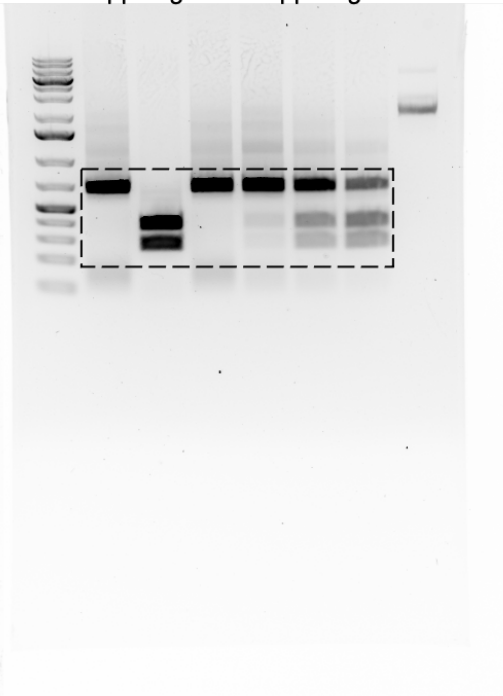

Uncropped gel for Suppl. Fig. 4d

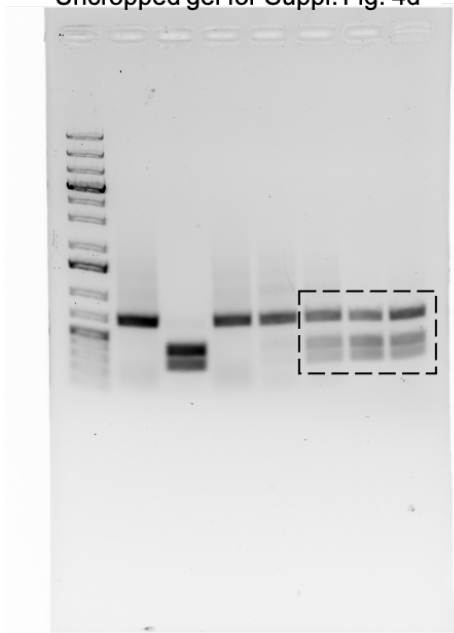

Uncropped gel for Suppl. Fig. 4f

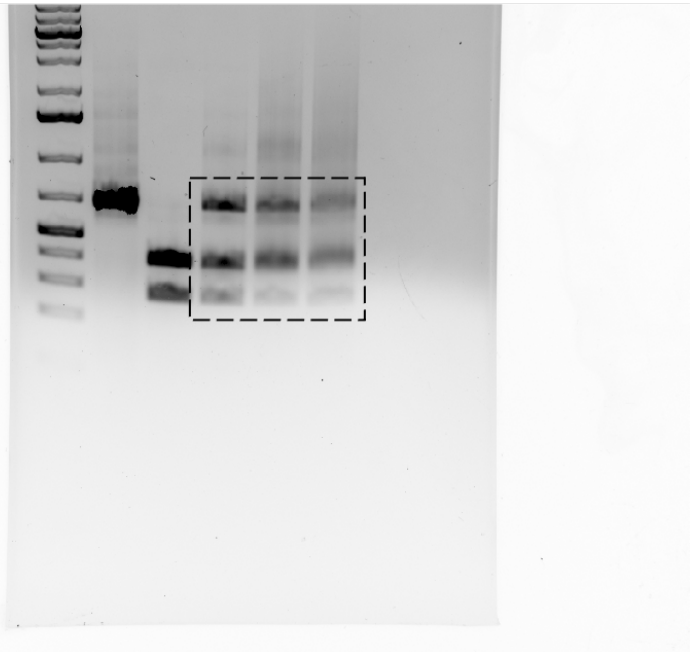

Uncropped gel for Suppl. Fig. 7a

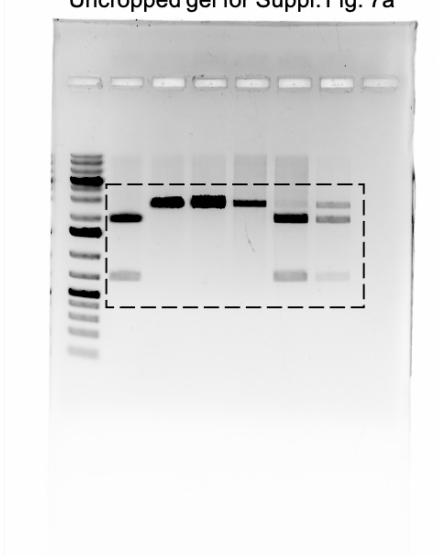

Supplement: 41467_2025_55957_MOESM1_ESM.pdf [file 41467_2025_55957_MOESM1_ESM.pdf]
